# Supplementary material for: Facile synthesis of hybrid nanorods with the Sb2Se3/AgSbSe2 heterojunction structure for high performance photodetectors
Source: Royal Society of Chemistry journal article supplement (doi:10.1039/c5nr06384a), 2015-12-23
Supplement: c5nr06384a1.pdf [file c5nr06384a1.pdf]

## Facile Synthesis of Hybrid Nanorods with $\text{Sb}_2\text{Se}_3/\text{AgSbSe}_2$

### Heterojunction Structure for High Performance Photodetectors

Shuo Chen, Xvsheng Qiao, Fengxia Wang, Qun Luo, Xianghua Zhang, Xia Wan, Yang Xu, Xianping Fan\*

**Synthesis of  $\text{AgSbSe}_2$  nanoparticles:** 24 mmol selenium dioxide and 30 ml 1-octadecene were added into a three-neck flask and heated to  $200^\circ\text{C}$  for several hours with stirring under argon atmosphere until selenium dioxide completely dissolved and formed a 0.8 M selenium precursor solution. And then 1 mmol antimony acetate, 1 mmol silver acetate, 8 mmol 1-hexadecylamine, 20 ml 1-octadecene and 8 ml oleic acid were mixed at  $220^\circ\text{C}$  for 1 h in another flask, which formed a transparent yellow antimony-silver precursor solution. The temperature of the antimony-silver precursor solution was heated up to  $240^\circ\text{C}$ , and then 8 ml 0.8 M selenium precursor solution which had been cooled to room temperature was swiftly injected. The mixture was stirred for 10 min and then cooled to room temperature. The obtained  $\text{AgSbSe}_2$  nanoparticles were collected by centrifugation, washed with chloroform and isopropyl alcohol for several times, and finally dried at  $60^\circ\text{C}$  under vacuum.

**Fabrication of photodetector:** To explore the photoconductive characteristics, a prototype photodetector is constructed. Fig. S1 shows a schematic diagram of  $\text{Sb}_2\text{Se}_3$  nanorods resting across the interdigital Au electrodes. The interdigitated Au electrodes with fingers (dimensions: width  $20\ \mu\text{m}$ , length  $200\ \mu\text{m}$ , interfinger spacing  $20\ \mu\text{m}$ ) were fabricated on  $\text{SiO}_2/\text{Si}$  substrates using lithography. To better perform the electrical measurements, the as-prepared nanorods were repeatedly purified and then ultrasonically dispersed in chloroform, drop-cast on pre-patterned electrodes, and dried by vacuum-annealing at  $40^\circ\text{C}$  for 30 min before the photocurrent measurements.

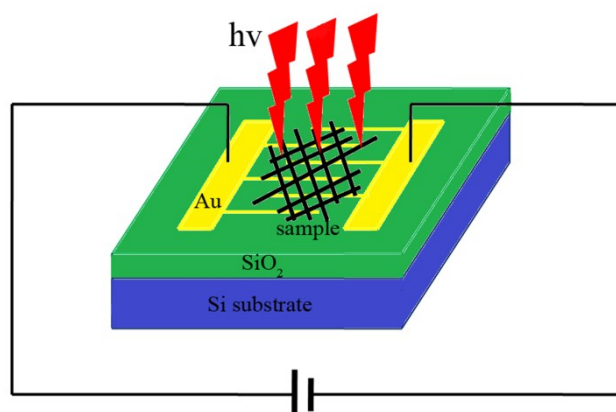

**Fig. S1** Schematic illustration of the photodetector based on the  $\text{Sb}_2\text{Se}_3$  nanorods film.

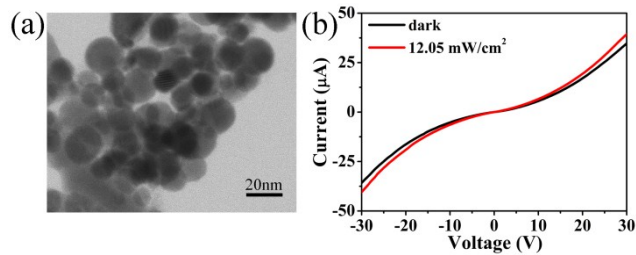

**Fig. S2** (a) TEM image of AgSbSe<sub>2</sub> nanoparticles. (b) Dark current and photocurrent at an incident light density of 12.05 mW/cm<sup>2</sup> of the photodetector based on AgSbSe<sub>2</sub> nanoparticles film.

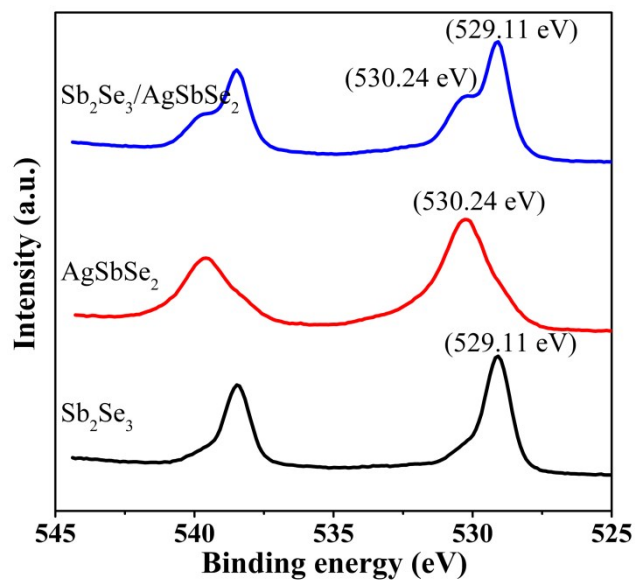

**Fig. S3** Sb-3d x-ray photoelectron spectroscopy for AgSbSe<sub>2</sub>, Sb<sub>2</sub>Se<sub>3</sub> and Sb<sub>2</sub>Se<sub>3</sub>/AgSbSe<sub>2</sub> nanorods.

**Table S1** Electrical properties of the as-synthesized samples

| Sample                                               | Resistivity (Ω cm)     | Hall mobility (cm <sup>2</sup> V <sup>-1</sup> s <sup>-1</sup> ) | Carrier concentration (cm <sup>-3</sup> ) | Conduction type |
|------------------------------------------------------|------------------------|------------------------------------------------------------------|-------------------------------------------|-----------------|
| Sb <sub>2</sub> Se <sub>3</sub>                      | 9.57 × 10 <sup>6</sup> | 6.89                                                             | 9.46 × 10 <sup>10</sup>                   | P               |
| AgSbSe <sub>2</sub>                                  | 17.71                  | 4.91                                                             | 7.19 × 10 <sup>16</sup>                   | P               |
| Sb <sub>2</sub> Se <sub>3</sub> /AgSbSe <sub>2</sub> | 1.05 × 10 <sup>3</sup> | 4.04                                                             | 1.47 × 10 <sup>15</sup>                   | P               |
